# Supplementary material for: Empower to connect and connect to empower: experience in using a humanistic approach to improve patients’ access to, and experience of, care in isolation wards during the COVID-19 outbreak in Singapore
Source: PubMed Central journal article supplement — BMJ Open Qual. 2021 Jan 6;10(1):e000996. doi: 10.1136/bmjoq-2020-000996 (PMC7789203; doi:10.1136/bmjoq-2020-000996), 2021-01-06
Supplement: bmjoq-2020-000996supp001.pdf [file bmjoq-2020-000996supp001.pdf]

## Supplement

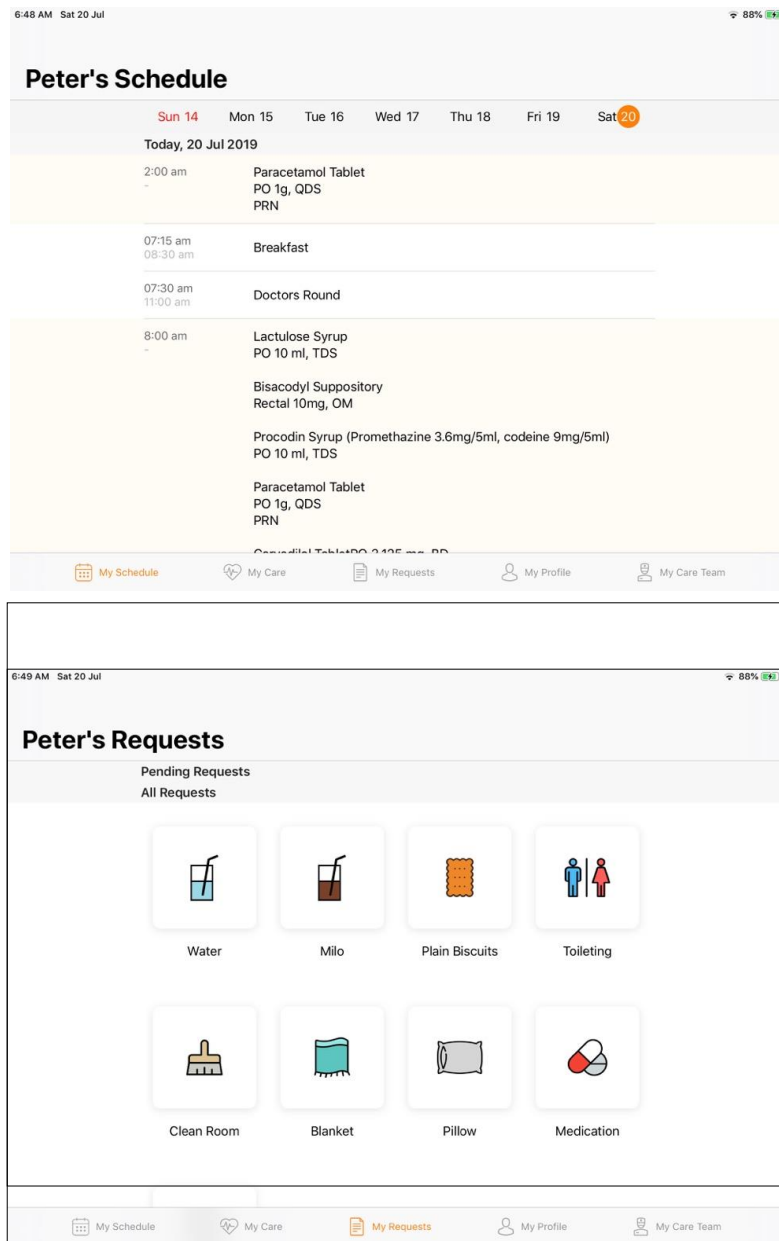

Figure 1. Sample screenshots from MyCare app

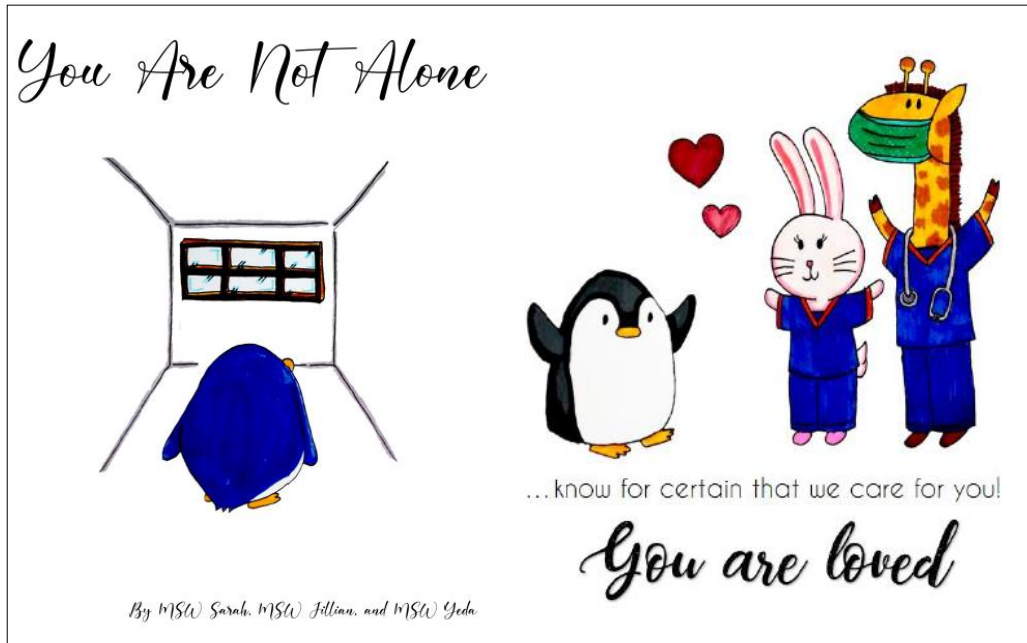

Figure 2. Encouraging cartoons drawn by medical social workers Sarah Lee and Yeda Ko
